# Supplementary material
Source: PubMed Central journal article supplement (PMC4813700)
Supplement: supp_M115.053819_mcp.M115.053819-1.pdf [file supp_M115.053819_mcp.M115.053819-1.pdf]

**A**

|      |                                                         |         |            |            |            |       |       |
|------|---------------------------------------------------------|---------|------------|------------|------------|-------|-------|
| H3.1 | ART                                                     | KQTARKS | TGGKAPRKQL | ATKAARKSAP | ATGGVKKPHR | YRPGT | VALRE |
| H3.3 | ART                                                     | KQTARKS | TGGKAPRKQL | ATKAARKSAP | STGGVKKPHR | YRPGT | VALRE |
|      |                                                         | 4       | 9          |            | 27         |       | 36    |
| H3.1 | IRRYQKSTEL LIRKLPFQRL VREIAQDFKT DLRFQSSAVM ALQEACEAYL  |         |            |            |            |       |       |
| H3.3 | IRRYQKSTEL LIRKLPFQRL VREIAQDFKT DLRFQSA AIG ALQEASEAYL |         |            |            |            |       |       |
|      |                                                         |         |            |            | 79         |       |       |
| H3.1 | VGLFEDTNLC AIHAKRVTIM PKDIQLARRI RGERA                  |         |            |            |            |       | 135   |
| H3.3 | VGLFEDTNLC AIHAKRVTIM PKDIQLARRI RGERA                  |         |            |            |            |       | 135   |

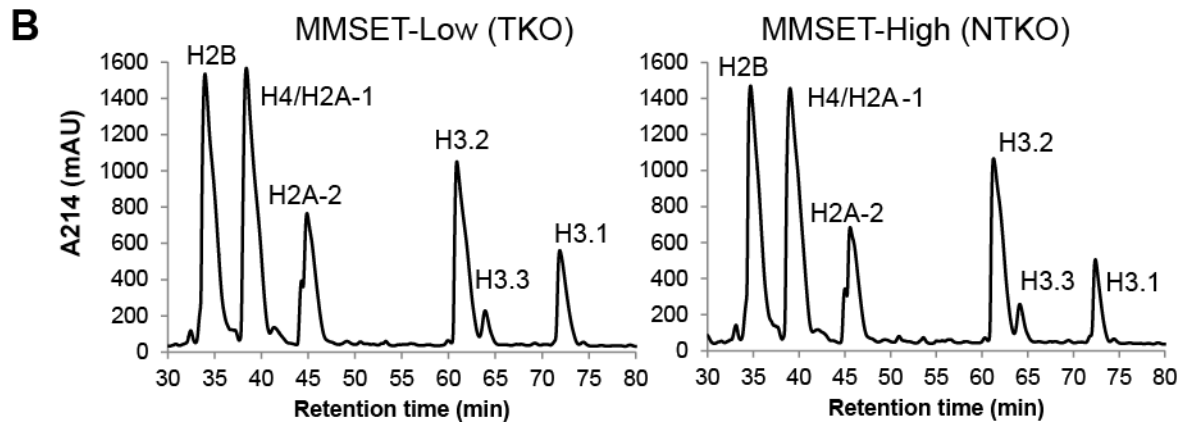

**Fig S1.** (A). The alignment of H3.1 and H3.3 variants. The different residues are labeled as red and the globular domain is indicated within a box. (B) UV trace of reverse phase HPLC separation of acid extracted total histones from MMSET-Low and MMSET-High cells.
