# Supplementary material
Source: PubMed Central journal article supplement (PMC4813700)
Supplement: supp_M115.053819_mcp.M115.053819-2.pdf [file supp_M115.053819_mcp.M115.053819-2.pdf]

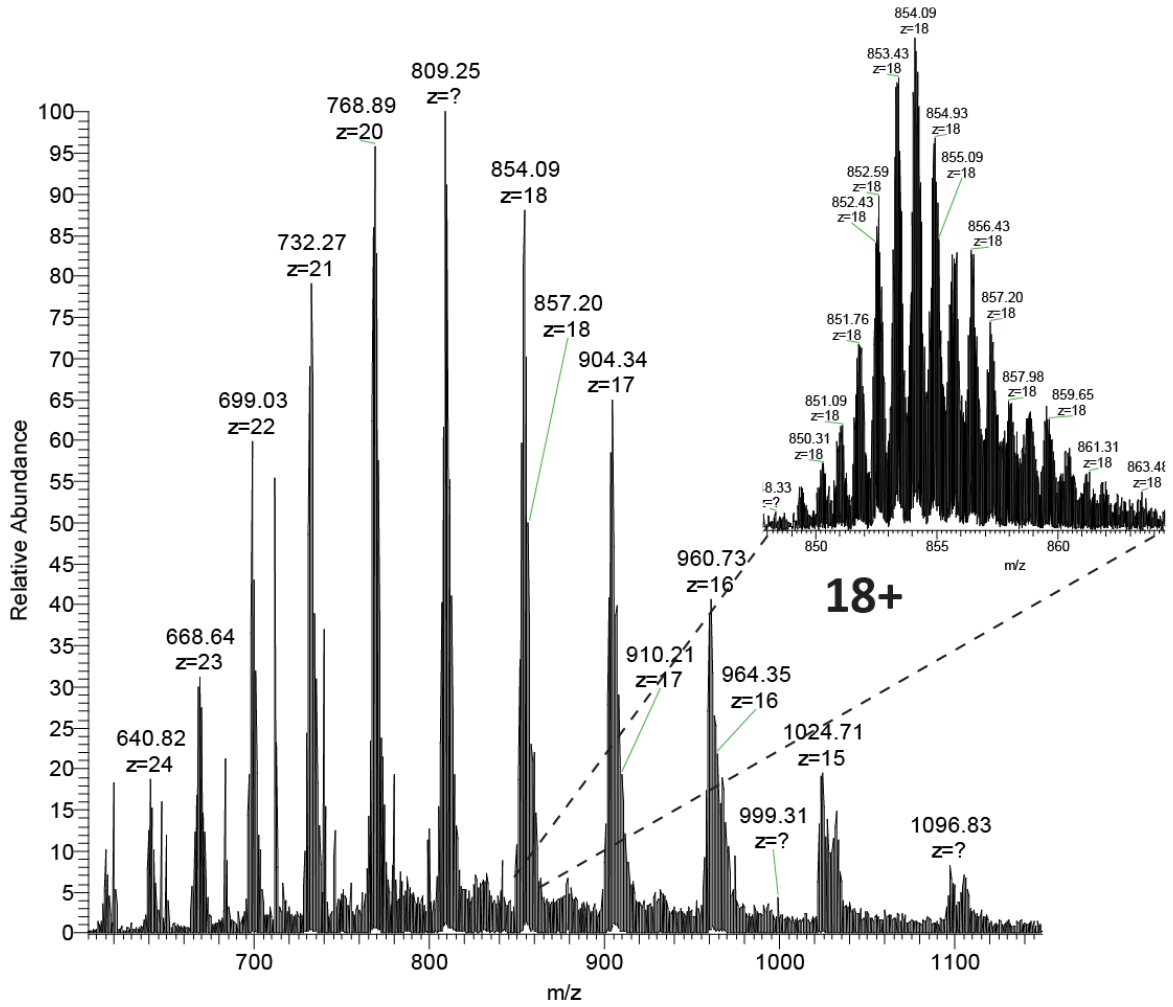

**Fig S2.** Charge state distribution of histone H3.1 from MMSET-High cells. Multiple isotopic distributions were observed within each single charge state (*e.g.*, for the 18+ ions in the inset that were subjected to tandem MS in this study).
