# Supplementary material
Source: PubMed Central journal article supplement (PMC4813700)
Supplement: supp_M115.053819_mcp.M115.053819-9.pdf [file supp_M115.053819_mcp.M115.053819-9.pdf]

**Table S2. Proteoform space**

|             | Modifications   | Possible Proteoforms | Subtotal |
|-------------|-----------------|----------------------|----------|
| 0 Methyl-Eq | unmodified      | 1                    | 1        |
| 1 Methyl-Eq | me1             | 3                    | 3        |
| 2 Methyl-Eq | me1 + me1       | 3                    | 6        |
|             | me2             | 3                    |          |
| 3 Methyl-Eq | me1 + me1 + me1 | 1                    | 10       |
|             | me2 + me1       | 6                    |          |
|             | me3             | 3                    |          |
| 4 Methyl-Eq | me1 + me1 + me2 | 3                    | 12       |
|             | me2 + me2       | 3                    |          |
|             | me3 + me1       | 6                    |          |
| 5 Methyl-Eq | me1 + me1 + me3 | 3                    | 12       |
|             | me1 + me2 + me2 | 3                    |          |
|             | me2 + me3       | 6                    |          |
| 6 Methyl-Eq | me1 + me2 + me3 | 6                    | 10       |
|             | me2 + me2 + me2 | 1                    |          |
|             | me3 + me3       | 3                    |          |
| 7 Methyl-Eq | me1 + me3 + me3 | 3                    | 6        |
|             | me2 + me2 + me3 | 3                    |          |
| 8 Methyl-Eq | me2 + me3 + me3 | 3                    | 3        |
| 9 Methyl-Eq | me3 + me3 + me3 | 3                    | 1        |
| Total       |                 |                      | 64       |

Theoretical combinations of methylations when there is three possible lysine methylation sites.
